# Supplementary material for: Immunophenotyping of very preterm infants at risk of developing sepsis and necrotizing enterocolitis
Source: Research Square preprint supplement (doi:10.21203/rs.3.rs-6396045/v1), 2025-05-06
Supplement: Supplementary file 1 [file 1de809d0005120933ba00eba.docx]

**Supplementary**

| **Subset** |  |  | **Phenotype** |
| --- | --- | --- | --- |
| **NK cells** |  |  | CD45+/CD3-/CD19-/CD16+CD56+ |
| **B cells** |  |  | CD45+/CD3-/CD19+ |
|  | Pre-germinal B cells |  | CD27-/IgM+/IgD++ |
|  | Switched CD27- B cells |  | CD27-/IgM-/IgD- |
|  | Memory B cells |  | CD27+/CD38- |
|  |  | Switched MBC | IgM-/IgD- |
|  |  | Unswitched MBC | IgM+/IgD+ |
|  |  | IgD MBC | IgM-/IgD+ |
|  | Plasma cells |  | CD27+/CD38++ |
| **T cells** |  |  | CD45+/CD3+/CD19- |
|  | CD4+ |  | CD4+/CD8-/TCRgd- |
|  |  | Naive CD4 | CD27+/CD45RA+ |
|  |  | CM CD4 | CD27+/CD45RA- |
|  |  | EM CD4 | CD27-/CD45RA- |
|  |  | TD CD4 | CD27-/CD45RA+ |
|  | CD8+ |  | CD4-/CD8+/TCRgd- |
|  |  | Naive CD8 | CD27+/CD45RA+ |
|  |  | CM CD8 | CD27+/CD45RA- |
|  |  | EM CD8 | CD27-/CD45RA- |
|  |  | TD CD8 | CD27-/CD45RA+ |
|  | Double negative T cells |  | CD4-/CD8-/TCRgd- |
|  | TCRgd |  | CD3+/TCRgd+ |

**Supplementary Table 1.** Immunophenotyping of lymphocyte subsets. Abbreviations: NK, natural killer; IgM, immunoglobulin M; IgD, immunoglobulin D; MBC, memory B cells; CM, central memory; EM, effector memory; TD, terminally differentiated; TCR, T cell receptor.

.

**
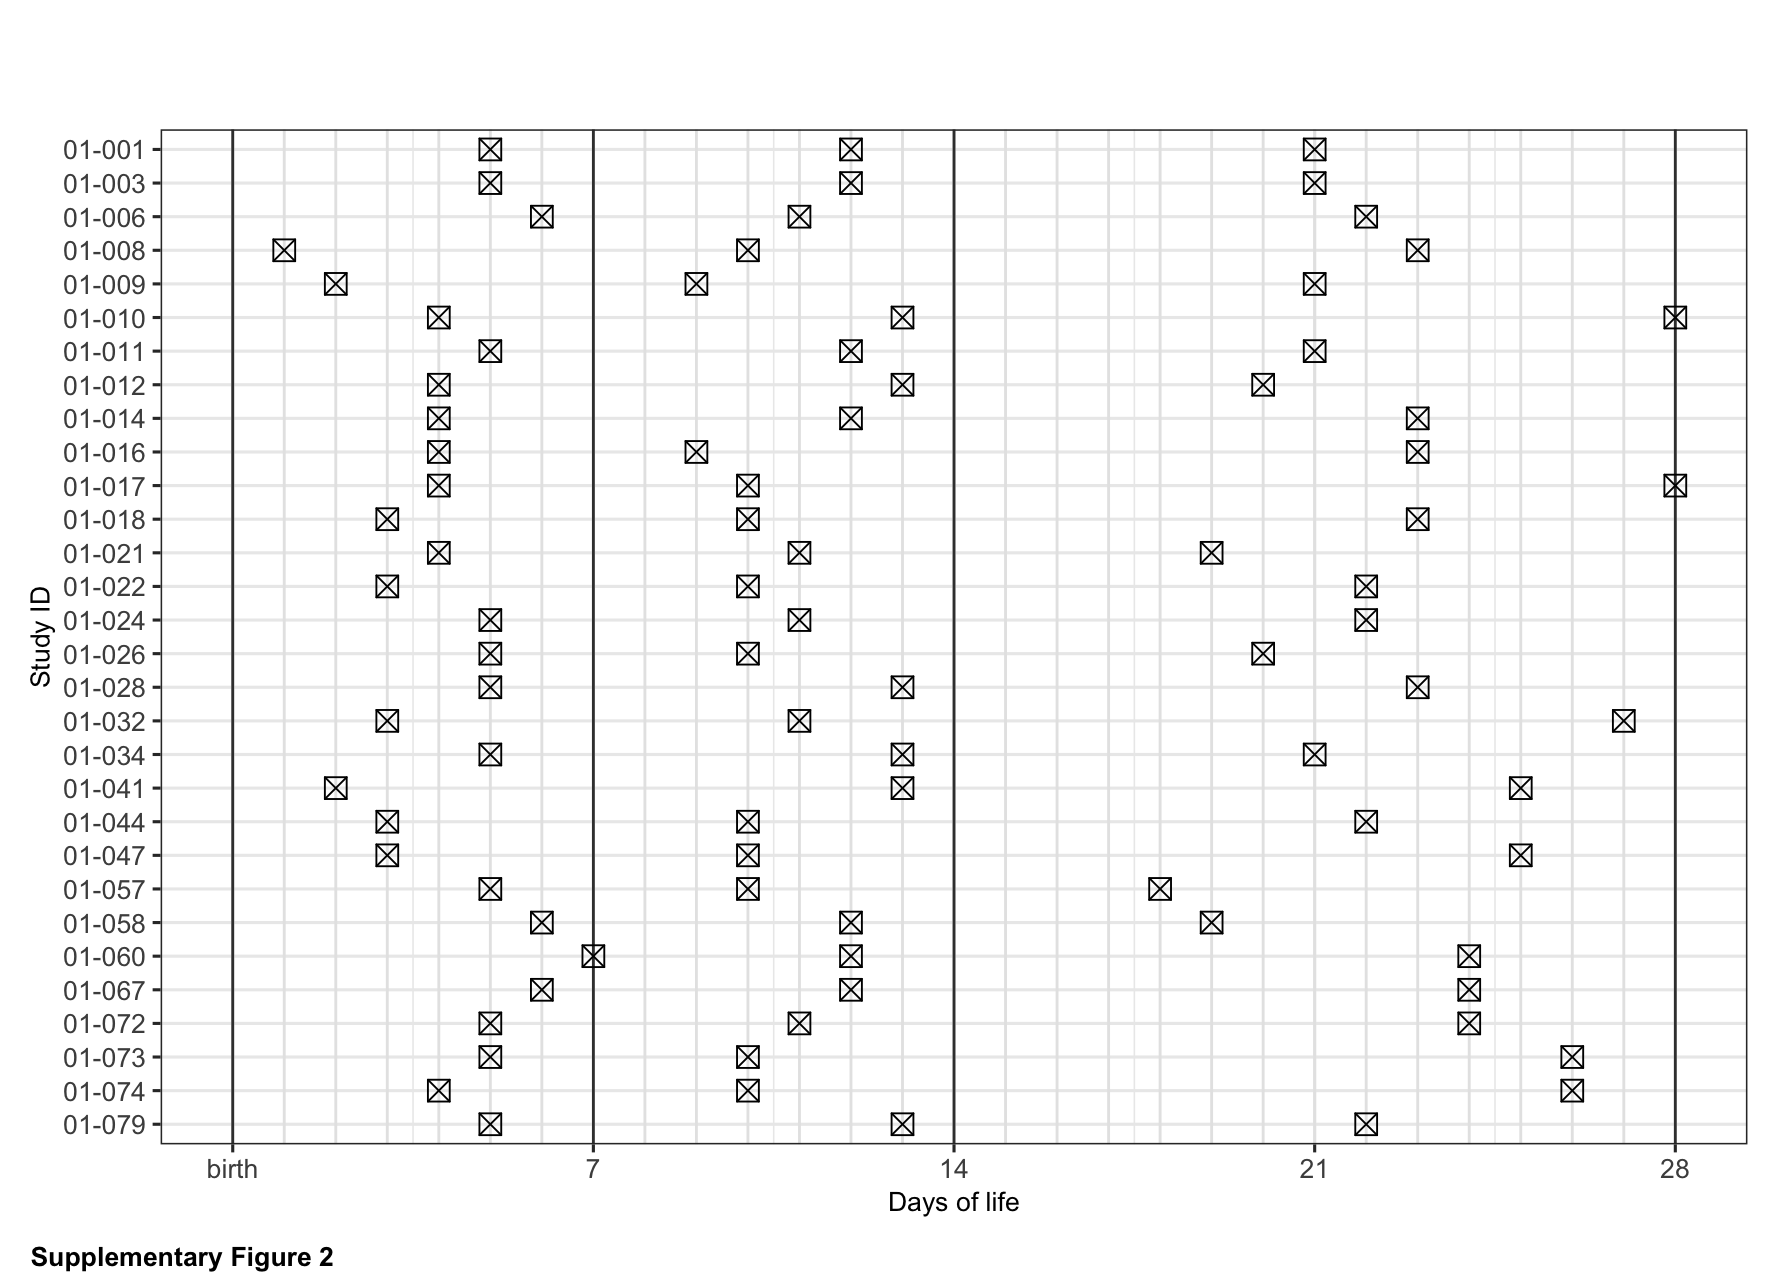
**

**Supplementary figure 2.** Samples.

**
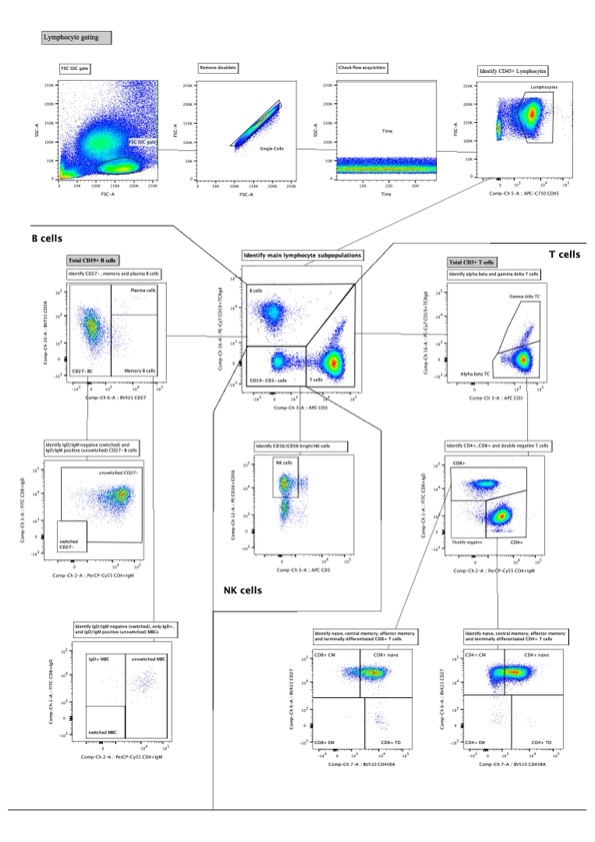
**

**Supplementary figure 2.** Lymphocyte gating. Abbreviations: FSC, forward scatter; SSC, side scatter; NK, natural killer.

**
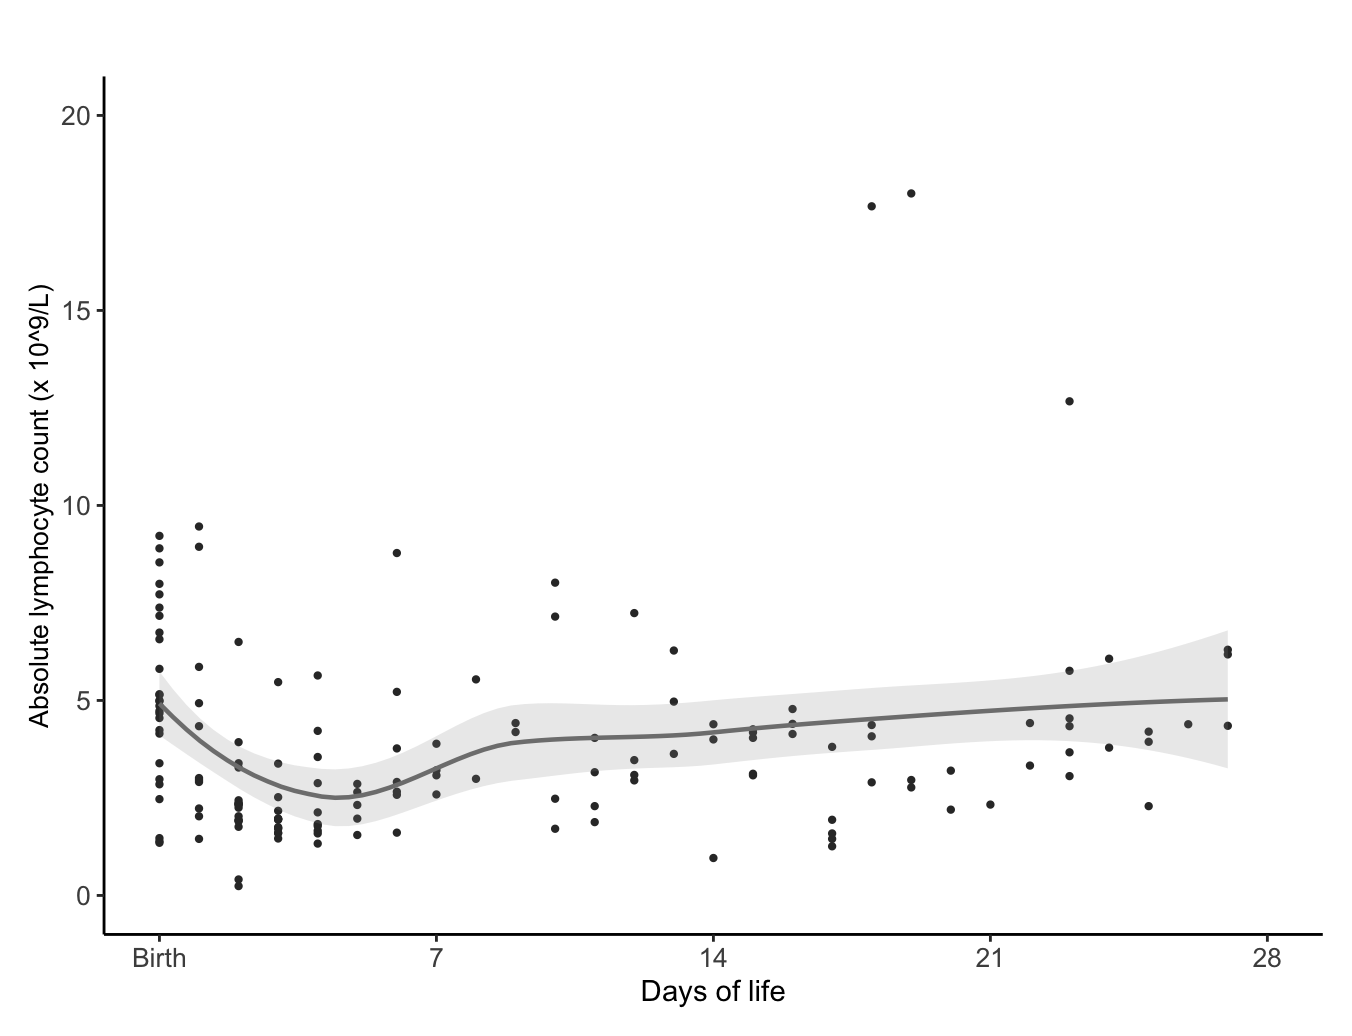
Supplementary figure 3.** Available data and trends in absolute lymp
